# Supplementary material for: An anti-oil-fouling superhydrophilic composite aerogel for solar saline alkali water desalination
Source: Royal Society of Chemistry journal article supplement (doi:10.1039/d2nj01743a), 2022-01-01
Supplement: d2nj01743a2.pdf [file d2nj01743a2.pdf]

## **Anti-Oil-fouling Superhydrophilic Composite Aerogel for**

### **Solar Saline Alkali Water Desalination**

Jiayu Yan, Zhen Zhang, Yongxin Shi, Qinglai Che, Qing Miao, Guihua Meng\*, Zhiyong Liu\*

School of Chemistry and Chemical Engineering, Shihezi University/Key Laboratory for Green Processing of Chemical Engineering of Xinjiang Bingtuan/Key Laboratory of Materials-Oriented Chemical Engineering of Xinjiang Uygur Autonomous Region/Engineering Research Center of Materials-Oriented Chemical Engineering of Xinjiang Bingtuan, Shihezi, Xinjiang 832003, P.R. China

**\*Corresponding author:** Dr. Guihua Meng & Prof. Zhiyong Liu

School of Chemistry and Chemical Engineering/Key Laboratory for Green Processing of Chemical Engineering of Xinjiang Bingtuan, Xinjiang, P.R. China, 832003

**Address:** Beisi Road, Shihezi City, Xinjiang, 832003, P.R. China

**E-mail Address:** mghua0726@sina.com, lzyongclin@sina.com

## **Contents**

**S1.** Photo of the ASG-0PANi aerogel (white) and ASG aerogel (black).

**S2.** The local zoomed-in Images show the water-absorbing capacity of the ASG aerogel.

**S3.** Analysis of mercury-pressing data of ASG-0PANi and ASG aerogel.

**Table S1.** Porosity of ASG samples.

**Table S2.** Detailed parameters for calculating solar thermal efficiency of ASG samples under one-sun illumination.

**Table S3.** Detailed parameters for calculating solar thermal efficiency of water, ASG-0PANI, ASG and ASG-0SA aerogel under one-sun illumination

**S4.** The stress-strain curves of ASG aerogel at compressive strain.

**S5.** Schematic of the ASG aerogel solar-driven interfacial evaporation device.

**S6.** Photos of ASG aerogel floating on the water surface at different heights and top-view.

**S7.** Evaporation mass loss for different thickness of ASG aerogel under one-sun illumination for 1 h.

**S8.** Evaporation mass loss for different aniline monomer concentrations of ASG aerogel under one-sun illumination for 1 h.

**S9.** Linear dependency of salinity and conductance of NaCl solution under 25 °C.

**Table S4. Comparison parameters for a solar steam generation made with different kinds of materials.**

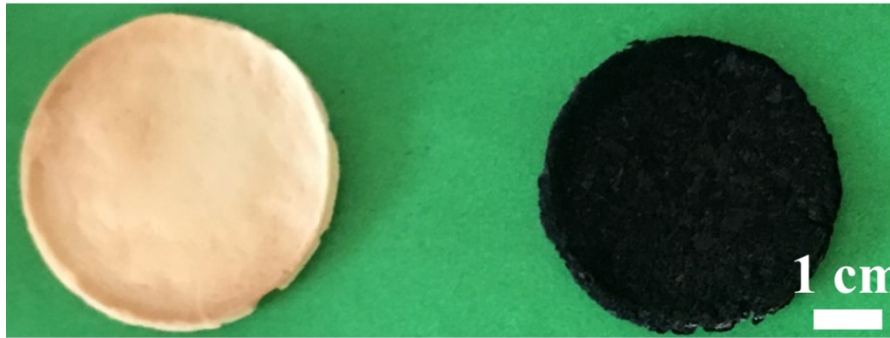

**Figure S1.** Photo of the ASG-0PANi aerogel (white) and ASG aerogel (black).

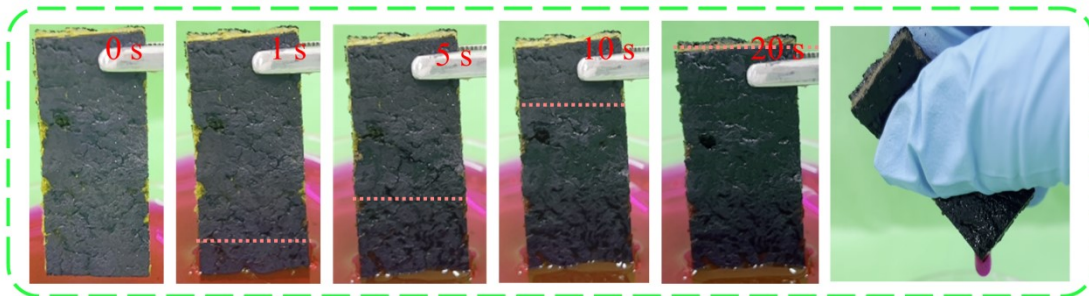

**Figure S2.** The local zoomed-in Images show the water-absorbing capacity of the ASG aerogel.

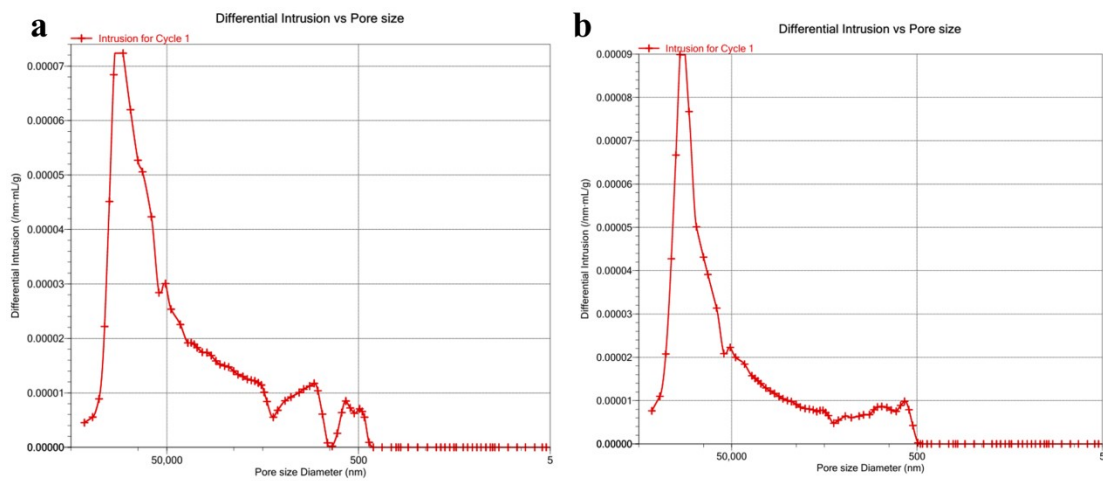

**Figure S3.** Analysis of mercury-pressing data of ASG-0PANi and ASG aerogel.

**Table S1.** Porosity of ASG samples.

| Samples           | Porosity (%) | Bulk density (g/mL) | Average pore size (nm) | Total hole capacity(mL/g) | Total hole area(m <sup>2</sup> /g) |
|-------------------|--------------|---------------------|------------------------|---------------------------|------------------------------------|
| ASG-0PANi aerogel | 93.11        | 0.0700              | 102761.25              | 13.3070                   | 0.518                              |
| ASG aerogel       | 93.35        | 0.0798              | 93412.72               | 11.6965                   | 0.561                              |

**Table S2.** Detailed parameters for calculating solar thermal efficiency

| Samples  | Water mass loss rate (Kg h <sup>-2</sup> h-1) | Average water temperature difference (°C) | Sensible heat (J Kg <sup>-1</sup> ) | Latent heat (J Kg <sup>-1</sup> ) | η (%) |
|----------|-----------------------------------------------|-------------------------------------------|-------------------------------------|-----------------------------------|-------|
| ASG-0.02 | 0.91                                          | 15.3                                      | 64.26                               |                                   | 55.4  |
| ASG-0.05 | 1.46                                          | 19.8                                      | 83.16                               |                                   | 91.5  |
| ASG-0.10 | 1.19                                          | 17.7                                      | 74.34                               | 2260                              | 73.8  |
| ASG-0.15 | 0.89                                          | 19.2                                      | 80.64                               |                                   | 54.1  |
| ASG-0.20 | 0.85                                          | 19.4                                      | 81.48                               |                                   | 51.8  |

**Table S3.** Detailed parameters for calculating solar thermal efficiency

| Samples           | Water mass loss rate (Kg h <sup>-2</sup> h-1) | Average water temperature difference (°C) | Sensible heat (J Kg <sup>-1</sup> ) | Latent heat (J Kg <sup>-1</sup> ) | η (%) |
|-------------------|-----------------------------------------------|-------------------------------------------|-------------------------------------|-----------------------------------|-------|
| Blank water       | 0.41                                          | 10.9                                      | 45.78                               |                                   | 22.8  |
| ASG-0PANi aerogel | 0.67                                          | 14.6                                      | 61.32                               |                                   | 39.7  |
| ASG-0SA aerogel   | 1.14                                          | 17.9                                      | 75.18                               | 2260                              | 70.8  |
| ASG aerogel       | 1.46                                          | 19.8                                      | 83.16                               |                                   | 91.5  |

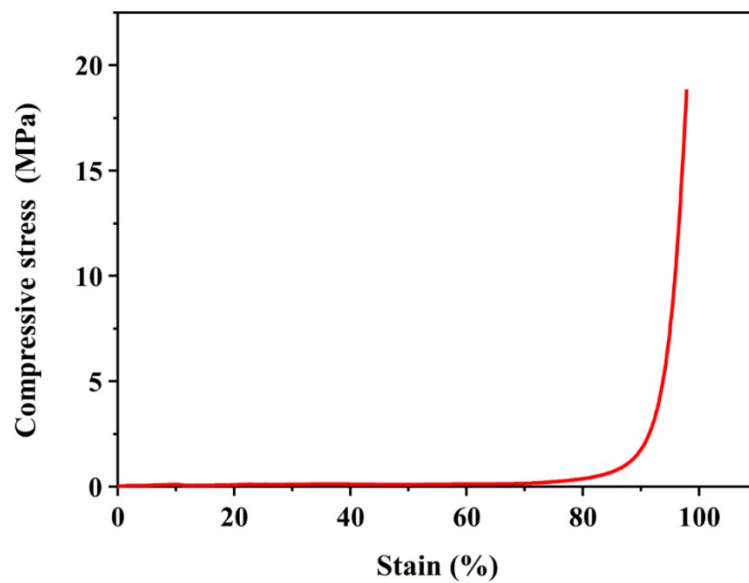

**Figure S4.** The stress-strain curves of ASG aerogel at compressive strain.

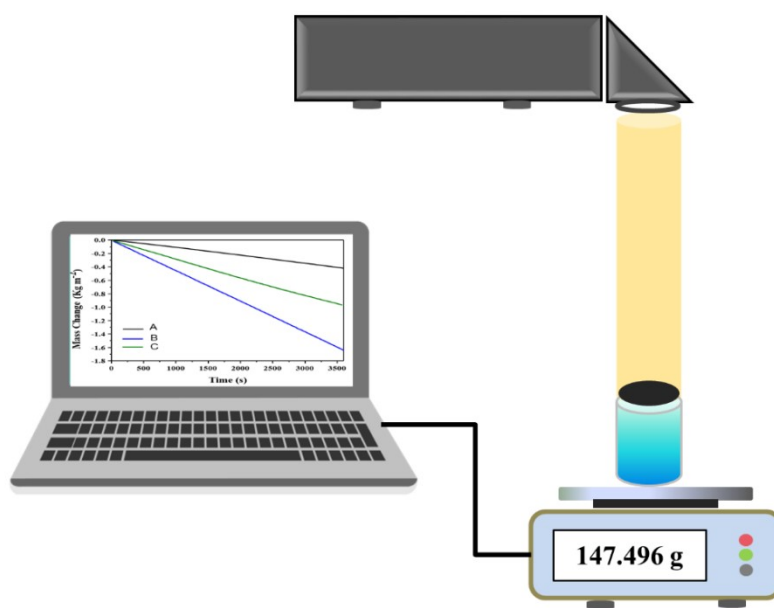

**Figure S5.** Schematic of the ASG aerogel solar-driven interfacial evaporation device

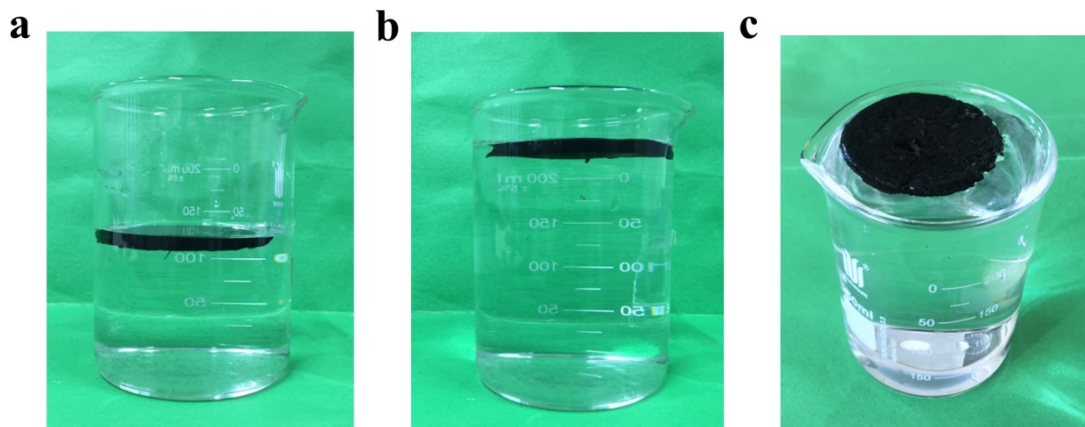

**Figure S6.** Photos of ASG aerogel floating on the water surface at different heights and top-view, the water was then pumped up and diffused to the entire surface of the PVA/SA/PANi aerogel by hydrophilic interaction.

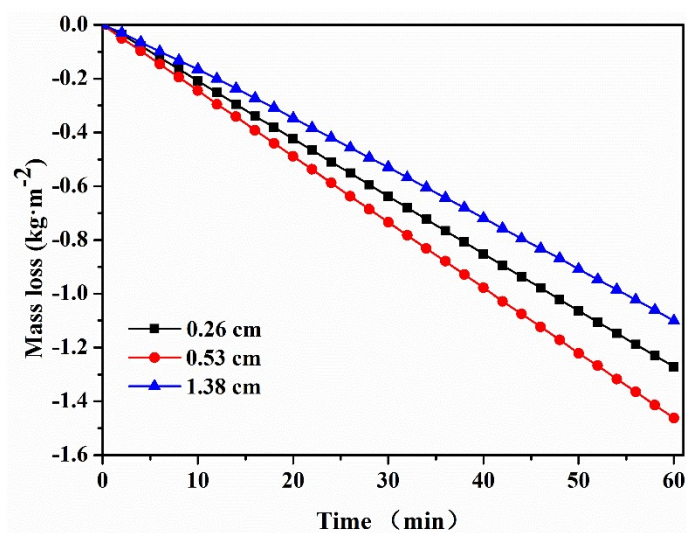

**Figure S7.** Evaporation mass loss for different thickness of ASG aerogel under one-sun illumination for 1 h.

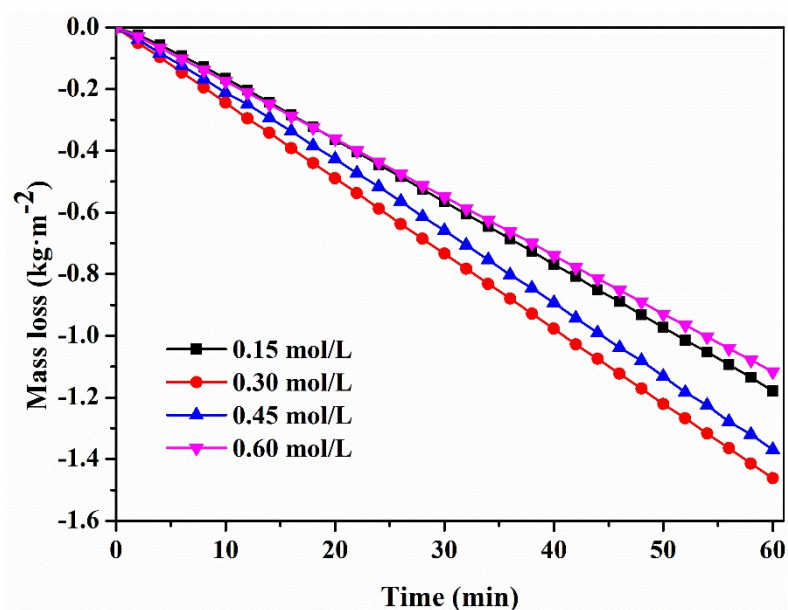

**Figure S8.** Evaporation mass loss for different aniline monomer concentrations of ASG aerogel under one-sun illumination for 1 h.

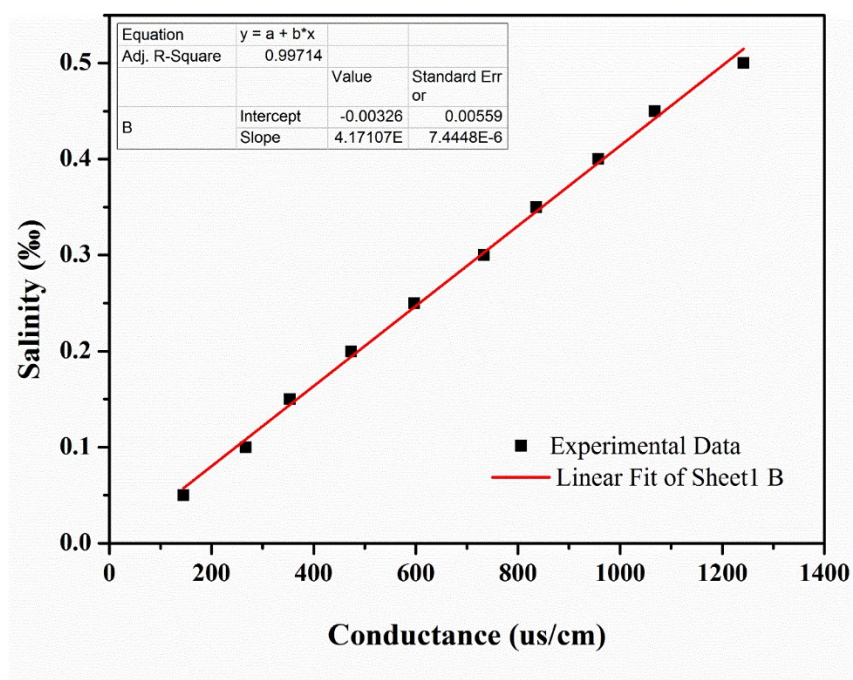

**Figure S9.** Linear dependency of salinity and conductance of NaCl solution under 25 °C.

The salinity and conductance of the NaCl solution exhibited a linear dependency in a range of salinity from 0.05 to 0.5 ‰. The standard curve was established for the calculation of salinity of purified water from artificial brine water. Three brine samples with representative simulated salinities (g dissolved salt / kg seawater, i.e. ‰), mild (lowest salinity 1.31 ‰), moderate (average salinity 5.22 ‰), and severe (highest salinity 13.10 ‰), were used and

carefully tracked by a conductivity test.

**Table S4 Comparison parameters for a solar steam generation made with different kinds of materials.**

| Materials    | Solar absorbers | Efficiency % | Evaporation rate $\text{kg} \cdot \text{m}^{-2} \cdot \text{h}^{-1}$ | Reference          |
|--------------|-----------------|--------------|----------------------------------------------------------------------|--------------------|
| Aerogel      | PANi            | 94.0%        | 1.65                                                                 | Ref. <sup>1</sup>  |
| Carbon fiber | PANi            | 93.7%        | 1.43                                                                 | Ref. <sup>2</sup>  |
| Hydrogel     | PANi            | 91.5%        | 1.40                                                                 | Ref. <sup>3</sup>  |
| Aerogel      | PANi            | 91.5%        | 1.46                                                                 | This work          |
| MOFs         | PANi            | 90.8%        | 1.87                                                                 | Ref. <sup>4</sup>  |
| Aerogel      | PANi            | 90.0%        | 1.58                                                                 | Ref. <sup>5</sup>  |
| Fabric       | PANi            | 89.9%        | 1.94                                                                 | Ref. <sup>6</sup>  |
| Foam         | PANi            | 87.3%        | 1.50                                                                 | Ref. <sup>7</sup>  |
| Cotton       | bSno@PANi       | 87.0%        | 1.74                                                                 | Ref. <sup>8</sup>  |
| Membrane     | PANi            | 85.0%        | 1.41                                                                 | Ref. <sup>9</sup>  |
| Foam         | PANi            | 80.5%        | 1.17                                                                 | Ref. <sup>10</sup> |
| Membrane     | PANi            | 74.2%        | 1.09                                                                 | Ref. <sup>11</sup> |

1. S. Li, Y. Y. He, Y. N. Wang, D. G. Liao, H. X. Liu, L. Zhou, C. Wei, C. B. Yu and Y. H. Chen, *Macromol. Mater. Eng.*, 2021, **306**.
2. K. Wang, B. B. Huo, F. Liu, Y. W. Zheng, M. H. Zhang, L. Cui and J. Q. Liu, *Desalination*, 2020, **481**.
3. X. Yin, Y. Zhang, Q. Guo, X. Cai, J. Xiao, Z. Ding and J. Yang, *ACS Appl Mater Interfaces*, 2018, **10**, 10998-11007.
4. Z. Li, X. Ma, D. Chen, X. Wan, X. Wang, Z. Fang and X. Peng, *Adv. Sci.*, 2021, **8**, 2004552.
5. S. Li, Y. Y. He, Y. P. Guan, X. Y. Liu, H. X. Liu, M. S. Xie, L. Zhou, C. Wei, C. B. Yu and Y.



- H. Chen, *Acs Applied Polymer Materials*, 2020, **2**, 4581-4591.
6. Z. X. Liu, B. H. Wu, B. Zhu, Z. G. Chen, M. F. Zhu and X. G. Liu, *Advanced Functional Materials*, 2019, **29**, 1905485.
  7. K. Wang, Z. Cheng, P. Li, Y. Zheng, Z. Liu, L. Cui, J. Xu and J. Liu, *J. Colloid Interface Sci.*, 2021, **581**, 504-513.
  8. N. Sharma, N. Swaminathan, C. H. Chi, R. B. Gurung and H. F. Wu, *Journal of Industrial and Engineering Chemistry*, 2022, **107**, 45-52.
  9. Y. Zou, X. F. Chen, W. C. Guo, X. H. Liu and Y. W. Li, *Acs Applied Energy Materials*, 2020, **3**, 2634-2642.
  10. Q. Chen, Z. Pei, Y. Xu, Z. Li, Y. Yang, Y. Wei and Y. Ji, *Chem Sci*, 2018, **9**, 623-628.
  11. Y. Peng, Y. Wang, W. Li and J. Jin, *Journal of Materials Chemistry A*, 2021, **9**, 10678-10684.
